# Supplementary material
Source: publisher figshare collection journal article supplement (https://tandf.figshare.com/ndownloader/files/17340671)
Supplement: Supplementary file 1 [file 17340671]

## Sheet: all participants (n＝27)
ID	age	gender	diagnosis	living	MMSE
1	79	1	healthy	lived their own	27		Group A
3	82	2	Alzheimer's disease	livied with her son	25
4	85	2	senile dementia	lived their own	24
7	89	2	Alzheimer's disease	lived their own	19
9	78	1	Alzheimer's disease	lived with his son's family	21
10	88	1	Alzheimer's disease	lived their own	22
11	87	2	Alzheimer's disease	lived their own	19
12	82	2	cerebrovascular dementia	lived their own	3
13	89	2	Alzheimer's disease	lived their own	19
17	74	1	healthy	lived their own	27
18	82	1	Alzheimer's disease	lived their own	19
19	90	2	Alzheimer's disease	lived their own	23
20	76	1	cerebrovascular dementia	lived their own	26
21	96	2	senile dementia	lived their own	18
22	72	2	cerebrovascular dementia	lived their own	15
25	76	2	cerebrovascular dementia	lived their own	22		Group B
26	75	2	alcoholic dementia	lived their own	17
27	83	2	Alzheimer's disease	lived their own	23
29	76	1	cerebrovascular dementia	lived their own	0
30	94	2	Alzheimer's disease	lived their own	25
31	77	2	healthy	lived their own	30
32	72	2	healthy	lived their own	28
33	77	2	healthy	lived their own	29
34	85	2	healthy	lived their own	29
35	77	1	healthy	lived with her husband	29
36	72	2	Alzheimer's disease	lived their own	18
37	87	1	Alzheimer's disease	lived their own	12
	81.4815				21.0741		drop out
	6.85212				7.34285

## Sheet: participants in analysis (n＝23)
ID	age	gender	diagnosis	MMSE (before intervention)	MMSE (after intervention)	COGNISTAT Orientation (before intervention)	COGNISTAT Orientation (after intervention)	COGNISTAT Attention (before intervention)	COGNISTAT Attention (after intervention)	COGNISTAT Language (before intervention)	COGNISTAT Language (after intervention)	COGNISTAT Repetition (before intervention)	COGNISTAT Repetition (after intervention)	COGNISTAT Naming (before intervention)	COGNISTAT Naming (after intervention)	COGNISTAT Constructions (before intervention)	COGNISTAT Constructions (after intervention)	COGNISTAT Memory (before intervention)	COGNISTAT Memory (after intervention)	COGNISTAT Calculations (before intervention)	COGNISTAT Calculations (after intervention)	COGNISTAT Reasoning (before intervention)	COGNISTAT Reasoning (after intervention)	COGNISTAT Judgement (before intervention)	COGNISTAT Judgement (after intervention)	DBD (before intervention)	DBD (after intervention)
1	79	1	healthy	27	27	9	9	10	10	10	10	9	9	10	10	9	9	7	7	10	10	9	9	11	11	7	7
3	82	2	Alzheimer's disease	25	26	4	12	3	10	7	7	7	10	9	10	8	8	6	7	10	10	10	10	11	12	18	22
4	85	2	senile dementia	24	27	10	10	1	0	4	10	6	5	9	9	6	8	9	9	8	10	8	10	11	12	5	2
10	88	1	Alzheimer's disease	22	21	9	5	10	3	4	7	8	7	10	9	8	8	8	9	10	6	8	9	10	8	30	30
11	87	2	Alzheimer's disease	19	22	6	5	10	10	10	7	10	11	9	9	6	6	5	6	10	10	9	10	10	11	17	15
13	89	2	Alzheimer's disease	19	21	2	5	6	10	7	10	11	11	10	10	8	6	6	6	8	10	10	9	10	10	12	10
17	74	1	healthy	27	27	8	10	6	6	7	10	8	9	7	7	8	8	9	9	10	10	9	10	9	10	13	13
18	82	1	Alzheimer's disease	19	27	1	9	6	10	10	10	11	11	10	10	8	11	7	7	10	10	7	10	11	11	11	9
19	90	2	Alzheimer's disease	23	24	2	8	3	10	10	10	11	11	9	10	8	9	6	5	10	10	10	10	12	10	11	11
20	76	1	cerebrovascular dementia	26	29	10	10	6	3	10	10	11	11	10	10	11	11	10	10	10	10	10	10	11	11	19	17
21	96	2	senile dementia	18	19	1	4	6	6	10	10	11	11	9	9	9	8	6	6	10	10	10	10	9	9	4	6
22	72	2	cerebrovascular dementia	15	16	not assessed	not assessed	not assessed	not assessed	not assessed	not assessed	not assessed	not assessed	not assessed	not assessed	not assessed	not assessed	not assessed	not assessed	not assessed	not assessed	not assessed	not assessed	not assessed	not assessed	6	5
26	75	2	alcoholic dementia	20	15	not assessed	not assessed	not assessed	not assessed	not assessed	not assessed	not assessed	not assessed	not assessed	not assessed	not assessed	not assessed	not assessed	not assessed	not assessed	not assessed	not assessed	not assessed	not assessed	not assessed	13	13
27	83	2	Alzheimer's disease	24	25	0	10	1	1	0	10	4	6	5	10	4	4	9	9	0	6	0	9	0	10	24	23
29	76	1	cerebrovascular dementia	20	20	not assessed	not assessed	not assessed	not assessed	not assessed	not assessed	not assessed	not assessed	not assessed	not assessed	not assessed	not assessed	not assessed	not assessed	not assessed	not assessed	not assessed	not assessed	not assessed	not assessed	15	15
30	94	2	Alzheimer's disease	19	25	10	4	1	3	4	1	6	8	10	10	5	5	10	7	4	6	8	10	10	9	8	6
31	77	2	healthy	29	30	1	10	10	0	1	10	8	3	9	3	7	9	6	9	8	10	10	9	10	9	3	2
32	72	2	healthy	28	29	6	10	0	10	1	10	3	11	5	10	8	11	7	10	10	10	6	0	8	0	1	1
33	77	2	healthy	25	30	10	10	10	1	10	10	11	11	10	10	11	9	10	10	10	10	10	11	11	11	5	3
34	85	2	healthy	30	30	9	10	7	6	10	10	11	11	10	10	9	11	10	9	10	10	11	10	11	11	2	1
35	77	1	healthy	29	29	9	10	10	10	10	10	9	11	10	10	8	9	9	10	10	10	10	11	12	12	6	4
36	72	2	Alzheimer's disease	18	18	10	10	10	10	10	10	11	11	10	10	11	11	10	10	10	10	10	11	12	10	20	20
37	87	1	Alzheimer's disease	11	11	9	1	10	10	10	0	11	9	10	9	11	0	8	0	10	0	10	6	12	10	21	21
	81.5217
	7.1406
